# Supplementary material
Source: publisher figshare collection journal article supplement (https://tandf.figshare.com/ndownloader/files/21654231)
Supplement: Supplementary file 1 [file 21654231]

**Supplements**


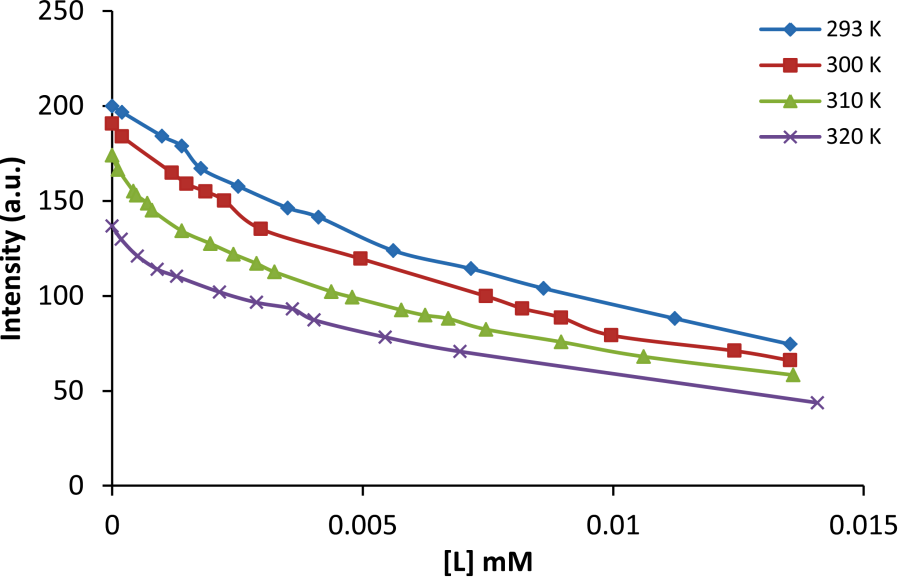


Fig. S1. Changes in the maximum fluorescence emission of HSA (4.24 μM) with increasing concentration of Pd-HDP, 0-2.6 μM


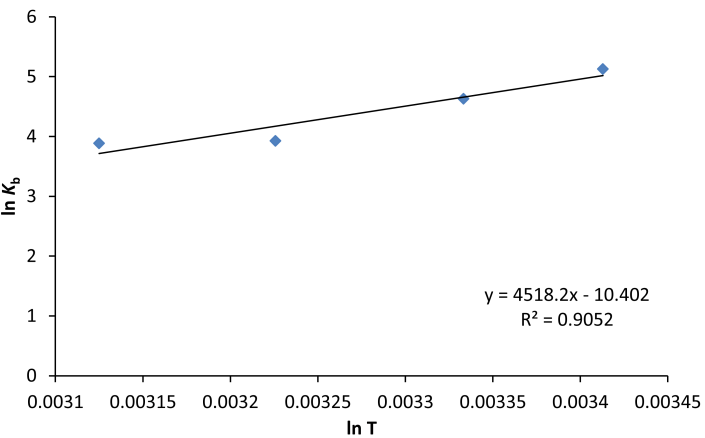


Fig.S2. van’t Hoff plot for the interaction of HSA with Pd-HDP at pH 7.4


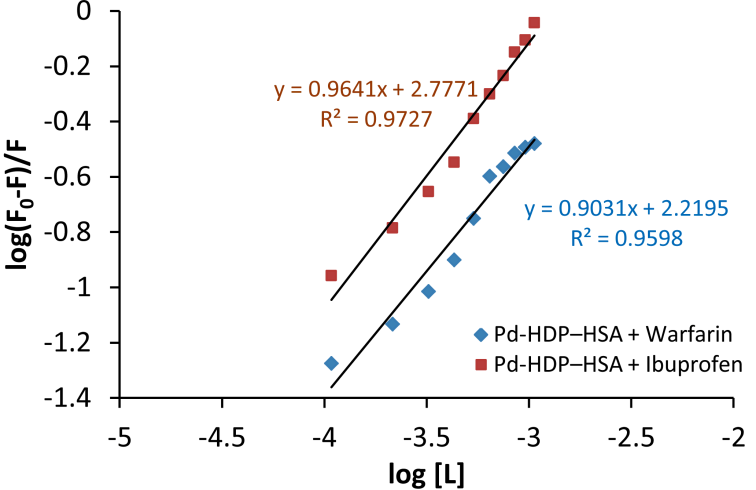


Fig. S3. The plots of log (*F*0 - *F*)/*F* versus log [L] for Pd-HDP–HSA + Ibo (■) and Pd-HDP–HSA + War (⬥) systems
